# Supplementary material for: In Vitro and In Silico Analysis of New n-Butyl and Isobutyl Quinoxaline-7-carboxylate 1,4-di-N-oxide Derivatives against Trypanosoma cruzi as Trypanothione Reductase Inhibitors
Source: MDPI journal article supplement (doi:10.3390/ijms232113315), 2022-11-01
Supplement: s1 [file s1]

## SUPPLEMENTARY INFORMATION

# ***In vitro* and *in silico* analysis of new n-butyl and isobutyl-quinoxaline-7-carboxylate 1,4-di-N-oxide derivatives against *Trypanosoma cruzi* as trypanothione reductase inhibitors**

Alonzo González-González<sup>1</sup>, Oscar Sánchez-Sánchez<sup>1</sup>, R. Luise Krauth-Siegel<sup>2</sup>, María Laura Bolognesi<sup>3</sup>, Rogelio Gómez-Escobedo<sup>4</sup>, Benjamín Noguera-Torres<sup>4</sup>, Lenci K. Vázquez-Jiménez<sup>1</sup>, Emma Saavedra<sup>5</sup>, Rusely Encalada<sup>5</sup>, José Carlos Espinoza-Hicks<sup>6</sup>, Alma D. Paz-González<sup>1</sup> and Gildardo Rivera<sup>1\*</sup>

<sup>1</sup> Laboratorio de Biotecnología Farmacéutica, Centro de Biotecnología Genómica, Instituto Politécnico Nacional, Reynosa 88710, México

<sup>2</sup> Center of Biochemistry, Heidelberg University, Im Neuenheimer Feld 328, 69120 Heidelberg, Germany

<sup>3</sup> Department of Pharmacy and Biotechnology, Alma Mater Studiorum, University of Bologna, I-40126, Bologna, Italy

<sup>4</sup> Departamento de Parasitología, Escuela Nacional de Ciencias Biológicas Instituto Politécnico Nacional, Ciudad de México 07738, México

<sup>5</sup> Departamento de Bioquímica. Instituto Nacional de Cardiología Ignacio Chávez, Ciudad de México 14080, México

<sup>6</sup> Facultad de Ciencias Químicas, Universidad Autónoma de Chihuahua, Chihuahua 31125, México

\*Corresponding author: [gildardors@hotmail.com](mailto:gildardors@hotmail.com)

## NMR and IR data

### Chemical compounds

**T-137:** 2-benzoyl-3-methyl-quinoxaline-7-butylcarboxylate-1,4-di-*N*-oxide. This compound obtained a 2.48 % yield. FT IR ( $\nu$   $\text{cm}^{-1}$ ): 1325.37 (*N*-Oxide); 2900-3000 (ArC-H); 2900-2800 (C-H); 1721.02, 1673.79 (C=O); 1160-1300 ((C=O)-C-O)  $\text{cm}^{-1}$ .  $^1\text{H}$ -NMR (400 MHz, DMSO-*d*6)  $\delta$  ppm: 1H-NMR:  $\text{CH}_2\text{-CH}_2\text{-CH}_2\text{-CH}_3$ , t, 0.98, 3H;  $\text{CH}_2\text{-CH}_2\text{-CH}_2\text{-CH}_3$ , m, 1.48, 2H;  $\text{CH}_2\text{-CH}_2\text{-CH}_2\text{-CH}_3$ , m, 1.79, 2H;  $\text{CH}_2\text{-CH}_2\text{-CH}_2\text{-CH}_3$ , t, 4.43, 2H; C=O-phenyl, dd, 8.07, 2H; t, 7.78, 2H; t, 7.6, 2H; QX(C3)  $\text{CH}_3$ , s, 2.34, 3H; QX(ring), dd, 8.38, 1H; d, 8.51, 1H; ds, 9.01, 1H.  $^{13}\text{C}$ -NMR (400 MHz, DMSO-*d*6)  $\delta$  ppm:  $\text{CH}_2\text{-CH}_2\text{-CH}_2\text{-CH}_3$ , 14.02;  $\text{CH}_2\text{-CH}_2\text{-CH}_2\text{-CH}_3$ , 19.19;  $\text{CH}_2\text{-CH}_2\text{-CH}_2\text{-CH}_3$ , 30.61;  $\text{CH}_2\text{-CH}_2\text{-CH}_2\text{-CH}_3$ , 66.08; C=O-O, 164.64 C=O-phenyl, 129.90, 129.95, 134.59, 140.19; C=O, 187.42 QX(C3)  $\text{CH}_3$ , 14.30; QX (ring), 121.29, 121.68, 130.85, 133.44, 135.93, 138.45, 139.29, 14.01.

**T-138:** 2-(4-chlorophenyl) carbamoyl-3-methyl-quinoxaline-7-butylcarboxylate-1,4-di-*N*-oxide. This compound obtained a 4.39 % yield. FT IR ( $\nu$   $\text{cm}^{-1}$ ): 1341.80 (*N*-Oxide), 3223.86 (N-H), 2900-3000 (ArC-H), 2900-2800 (C-H), 1720.41, 1676.46 (C=O); 1160-1300 ((C=O)-C-O); 600-830 (ArC-Cl).  $^1\text{H}$ -NMR (400 MHz, DMSO-*d*6)  $\delta$  ppm: 1H-NMR:  $\text{CH}_2\text{-CH}_2\text{-CH}_2\text{-CH}_3$ , t, 0.98, 3H;  $\text{CH}_2\text{-CH}_2\text{-CH}_2\text{-CH}_3$ , m, 1.47, 2H;  $\text{CH}_2\text{-CH}_2\text{-CH}_2\text{-CH}_3$ , m, 1.79, 2H;  $\text{CH}_2\text{-CH}_2\text{-CH}_2\text{-CH}_3$ , t, 4.42, 2H; C=O-NH-(4-Cl-phenyl), d, 7.71, 2H; d, 7.49, 2H; C=O-NH s, 11.12, 1H; QX(C3)  $\text{CH}_3$ , s, 2.53, 3H; QX(ring), dd, 8.41, 1H; d, 8.62, 1H; ds, 9.01, 1H.  $^{13}\text{C}$ -NMR (400 MHz, DMSO-*d*6)  $\delta$  ppm: 13C-NMR:  $\text{CH}_2\text{-CH}_2\text{-CH}_2\text{-CH}_3$ , 13.78;  $\text{CH}_2\text{-CH}_2\text{-CH}_2\text{-CH}_3$ , 19.23;  $\text{CH}_2\text{-CH}_2\text{-CH}_2\text{-CH}_3$ , 30.68;  $\text{CH}_2\text{-CH}_2\text{-CH}_2\text{-CH}_3$ , 66.48; C=O-O, 163.64 C=O-NH-(4-chloro-phenyl), 129.03, 121.28; C=O, 156.02 QX(C3)  $\text{CH}_3$ , 15.09; QX(ring), 130.53, 131.21, 134.20, 135.05, 135.55, 138.04, 138.44, 143.21.

**T-139:** 2-benzoyl-3-trifluoromethyl-quinoxaline-7-butylcarboxylate-1,4-di-*N*-oxide. This compound obtained a 19.02 % yield. FT IR ( $\nu$   $\text{cm}^{-1}$ ): 1338.87 (*N*-Oxide); 2900-3000 (ArC-H); 2900-2800 (C-H); 1724.48, 1689.38 (C=O); 1300-1160 ((C=O)-C-O); 1228-1135 (C-F).  $^1\text{H}$ -NMR (400 MHz, DMSO-*d*6)  $\delta$  ppm: 1H-NMR:  $\text{CH}_2\text{-CH}_2\text{-CH}_2\text{-CH}_3$ , t, 0.98, 3H;  $\text{CH}_2\text{-CH}_2\text{-CH}_2\text{-CH}_3$ , m, 1.48, 2H;  $\text{CH}_2\text{-CH}_2\text{-CH}_2\text{-CH}_3$ , m, 1.80, 2H;  $\text{CH}_2\text{-CH}_2\text{-CH}_2\text{-CH}_3$ , t, 4.42, 2H; C=O-phenyl, d, 8.50, 2H; t, 7.80, 2H; t, 7.6, 1H; QX(ring), dd, 8.14, 1H; d, 8.53, 1H; ds, 8.98, 1H.  $^{13}\text{C}$ -NMR (400 MHz, DMSO-*d*6)  $\delta$  ppm: 13C-NMR:  $\text{CH}_2\text{-CH}_2\text{-CH}_2\text{-CH}_3$ , 14.02;  $\text{CH}_2\text{-CH}_2\text{-CH}_2\text{-CH}_3$ , 19.18;  $\text{CH}_2\text{-CH}_2\text{-CH}_2\text{-CH}_3$ , 30.57;  $\text{CH}_2\text{-CH}_2\text{-CH}_2\text{-CH}_3$ , 66.29; C=O-O, 164.28;  $\text{CF}_3$ , 120.93; C=O-phenyl, 120.93, 129.71, 129.90, 130.17, 134.15, 134.40; C=O, 184.53; QX(ring), 121.50, 121.75, 130.52, 133.38, 138.96, 139.69, 141.21.

**T-140:** 2-(thienyl-2-carbonyl)-3-trifluoromethyl-quinoxaline-7-butylcarboxylate-1,4-di-*N*-oxide. This compound obtained a 20.58 % yield. FT IR ( $\nu$   $\text{cm}^{-1}$ ): 1329.93 (*N*-Oxide); 2900-3000 (ArC-H); 2900-2800 (C-H); 1721.06, 1661.24 (C=O); 1300-1160 ((C=O)-C-O); 1227-1134 (C-F); 700-600 (ArC-S).  $^1\text{H}$ -NMR (400 MHz, DMSO-*d*6)  $\delta$  ppm: 1H-NMR:  $\text{CH}_2\text{-CH}_2\text{-CH}_2\text{-CH}_3$ , t, 0.98, 3H;  $\text{CH}_2\text{-CH}_2\text{-CH}_2\text{-CH}_3$ , m, 1.48, 2H;  $\text{CH}_2\text{-CH}_2\text{-CH}_2\text{-CH}_3$ , m, 1.80, 2H;  $\text{CH}_2\text{-CH}_2\text{-CH}_2\text{-CH}_3$ , t, 4.43, 2H; C=O-thiophenyl, m, 8.23, 2H; t, 7.32, 1H; QX(ring), dd, 8.30, 1H; d, 8.53, 1H; ds, 8.98, 1H.  $^{13}\text{C}$ -NMR (400 MHz, DMSO-*d*6)  $\delta$  ppm: 13C-NMR:  $\text{CH}_2\text{-CH}_2\text{-CH}_2\text{-CH}_3$ , 14.02;  $\text{CH}_2\text{-CH}_2\text{-CH}_2\text{-CH}_3$ , 19.18;  $\text{CH}_2\text{-CH}_2\text{-CH}_2\text{-CH}_3$ , 30.57;  $\text{CH}_2\text{-CH}_2\text{-CH}_2\text{-CH}_3$ , 66.29; C=O-O, 164.26;  $\text{CF}_3$ , 120.86; C=O-thiophenyl, 134.20, 138.37, 141.29; C=O, 176.30; QX(ring), 121.64, 121.73, 129.90, 133.30, 138.43, 139.02, 139.61, 141.24.

**T-141:** 2-(tert-butoxy-carbonyl)-3-methyl-quinoxaline-7-butylcarboxylate-1,4-di-*N*-oxide. This compound obtained a 1.25 % yield. FT IR ( $\nu$   $\text{cm}^{-1}$ ): 1334.51 (*N*-Oxide); 2900-3000 (ArC-H); 2900-2800 (C-H); 1723.75 (C=O); 1160-1300 ((C=O)-C-O).  $^1\text{H}$ -NMR (400 MHz, DMSO-*d*6)  $\delta$  ppm: 1H-NMR:  $\text{CH}_2\text{-CH}_2\text{-CH}_2\text{-CH}_3$ , t, 0.97, 3H;  $\text{CH}_2\text{-CH}_2\text{-CH}_2\text{-CH}_3$ , m, 1.46, 2H;  $\text{CH}_2\text{-CH}_2\text{-CH}_2\text{-CH}_3$ , m, 1.77, 2H;  $\text{CH}_2\text{-CH}_2\text{-CH}_2\text{-CH}_3$ , t, 4.41, 2H; C=O-O( $\text{CH}_3$ )<sub>3</sub>, s, 1.62, 9H; QX(C3)  $\text{CH}_3$ , s, 2.48, 3H; QX(ring), dd, 8.36, 1H; d, 8.53, 1H; ds, 8.92, 1H.  $^{13}\text{C}$ -NMR (400 MHz, DMSO-*d*6)  $\delta$  ppm: 13C-NMR (ppm):  $\text{CH}_2\text{-CH}_2\text{-CH}_2\text{-CH}_3$ , 14.01;  $\text{CH}_2\text{-CH}_2\text{-CH}_2\text{-CH}_3$ , 19.17;  $\text{CH}_2\text{-CH}_2\text{-CH}_2\text{-CH}_3$ , 30.60;  $\text{CH}_2\text{-CH}_2\text{-CH}_2\text{-CH}_3$ , 66.05; C=O-O, 164.56 C=O-O-t-but, 28.05, 86.28; C=O-O, 158.83 QX(C3)  $\text{CH}_3$ , 14.30; QX (ring), 121.41, 121.66, 130.99, 133.49, 136.90, 138.02, 138.02, 139.38.

**T-142:** 2-(methoxy-carbonyl)-3-methyl-quinoxaline-7-butylcarboxylate-1,4-di-*N*-oxide. This compound obtained a 1.69 % yield. FT IR ( $\nu$   $\text{cm}^{-1}$ ): 1331.29 (*N*-Oxide); 2900-3000 (ArC-H); 2900-2800 (C-H); 1745.29, 1719.78 (C=O); 1160-1300 ((C=O)-C-O).  $^1\text{H}$ -NMR (400 MHz, DMSO-*d*6)  $\delta$  ppm: H-NMR:  $\text{CH}_2\text{-CH}_2\text{-CH}_2\text{-CH}_3$ , t, 0.97, 3H;  $\text{CH}_2\text{-CH}_2\text{-CH}_2\text{-CH}_3$ , m, 1.47, 2H;  $\text{CH}_2\text{-CH}_2\text{-CH}_2\text{-CH}_3$ , m, 1.77, 2H;  $\text{CH}_2\text{-CH}_2\text{-CH}_2\text{-CH}_3$ , t, 4.41, 2H; C=O-O( $\text{CH}_3$ ), s, 4.04, 3H; QX(C3)  $\text{CH}_3$ , s, 2.46, 3H;

QX(ring), dd, 8.36, 1H; d, 8.53, 1H; ds, 8.92, 1H. <sup>13</sup>C-NMR (400 MHz, DMSO-*d*<sub>6</sub>) δ ppm: 13C-NMR (ppm): CH<sub>2</sub>-CH<sub>2</sub>-CH<sub>2</sub>-CH<sub>3</sub>, 14.01; CH<sub>2</sub>-CH<sub>2</sub>-CH<sub>2</sub>-CH<sub>3</sub>, 19.18; CH<sub>2</sub>-CH<sub>2</sub>-CH<sub>2</sub>-CH<sub>3</sub>, 30.60; CH<sub>2</sub>-CH<sub>2</sub>-CH<sub>2</sub>-CH<sub>3</sub>, 66.04; C=O-O, 164.53 C=O-O-met, 54.47; C=O-O, 160.49 QX(C3) CH<sub>3</sub>, 14.61; QX (ring), 121.45, 121.63, 130.99, 131.03, 133.64, 138.13, 138.95, 139.90.

**T-143:** 2-(etoxy-carbonyl)-3-methyl-quinoxaline-7-butylcarboxylate-1,4-di-*N*-oxide. This compound obtained a 2.03 % yield. FT IR (ν cm<sup>-1</sup>): 1331.29 (*N*-Oxide); 2900-3000 (ArC-H); 2900-2800 (C-H); 1745.29, 1719.78 (C=O); 1160-1300 ((C=O)-C-O). <sup>1</sup>H-NMR (400 MHz, DMSO-*d*<sub>6</sub>) δ ppm: H-NMR: CH<sub>2</sub>-CH<sub>2</sub>-CH<sub>2</sub>-CH<sub>3</sub>, t, 0.97, 3H; CH<sub>2</sub>-CH<sub>2</sub>-CH<sub>2</sub>-CH<sub>3</sub>, m, 1.46, 2H; CH<sub>2</sub>-CH<sub>2</sub>-CH<sub>2</sub>-CH<sub>3</sub>, m, 1.76, 2H; CH<sub>2</sub>-CH<sub>2</sub>-CH<sub>2</sub>-CH<sub>3</sub>, t, 4.40, 2H; C=O-O(CH<sub>2</sub>CH<sub>3</sub>), t, 1.38, 3H; C=O-O(CH<sub>2</sub>CH<sub>3</sub>), q, 4.53, 2H; QX(C3) CH<sub>3</sub>, s, 2.48, 3H; QX(ring), dd, 8.37, 1H; d, 8.53, 1H; ds, 8.93, 1H. <sup>13</sup>C-NMR (400 MHz, DMSO-*d*<sub>6</sub>) δ ppm: 13C-NMR (ppm): CH<sub>2</sub>-CH<sub>2</sub>-CH<sub>2</sub>-CH<sub>3</sub>, 13.73; CH<sub>2</sub>-CH<sub>2</sub>-CH<sub>2</sub>-CH<sub>3</sub>, 19.23; CH<sub>2</sub>-CH<sub>2</sub>-CH<sub>2</sub>-CH<sub>3</sub>, 30.64; CH<sub>2</sub>-CH<sub>2</sub>-CH<sub>2</sub>-CH<sub>3</sub>, 66.22; C=O-O, 164.33; C=O-O(CH<sub>2</sub>CH<sub>3</sub>), 14.44; C=O-O(CH<sub>2</sub>CH<sub>3</sub>), 63.88; QX(C3):CH<sub>3</sub>: 14.01 C=O-O, 159.57; QX(ring), 120.78, 120.99, 122.32, 122.54, 131.35, 132.44, 132.45, 134.42

**T-144:** 2-(2,4-dimethyl-phenyl) carbamoyl-3-methyl-quinoxaline-7-butylcarboxylate-1,4-di-*N*-oxide. This compound obtained a 2.68 % yield. FT IR (ν cm<sup>-1</sup>): 1318.34 (*N*-Oxide); 3362.94 (N-H); 2900-3000 (ArC-H); 2900-2800 (C-H); 1720.34, 1694.60 (C=O); 1160-1300 ((C=O)-C-O). <sup>1</sup>H-NMR (400 MHz, DMSO-*d*<sub>6</sub>) δ ppm: 1H-NMR: CH<sub>2</sub>-CH<sub>2</sub>-CH<sub>2</sub>-CH<sub>3</sub>, t, 0.98, 3H; CH<sub>2</sub>-CH<sub>2</sub>-CH<sub>2</sub>-CH<sub>3</sub>, m, 1.48, 2H; CH<sub>2</sub>-CH<sub>2</sub>-CH<sub>2</sub>-CH<sub>3</sub>, m, 1.79, 2H; CH<sub>2</sub>-CH<sub>2</sub>-CH<sub>2</sub>-CH<sub>3</sub>, t, 4.40, 2H; C=O-NH-(2,4-dimethyl-phenyl), d, 7.51, 1H; d, 7.09, 1H; s, 7.12, 1H; C=O-NH-(2,4-dimethyl-phenyl) s, 2.51, 3H; s, 2.30, 3H; C=O-NH s, 10.24, 1H; QX(C3) CH<sub>3</sub>, s, 2.31, 3H; QX(ring), dd, 8.41, 1H; d, 8.64, 1H; ds, 9.01, 1H. <sup>13</sup>C-NMR (400 MHz, DMSO-*d*<sub>6</sub>) δ ppm: 13C-NMR: CH<sub>2</sub>-CH<sub>2</sub>-CH<sub>2</sub>-CH<sub>3</sub>, 14.02; CH<sub>2</sub>-CH<sub>2</sub>-CH<sub>2</sub>-CH<sub>3</sub>, 19.19; CH<sub>2</sub>-CH<sub>2</sub>-CH<sub>2</sub>-CH<sub>3</sub>, 30.66; CH<sub>2</sub>-CH<sub>2</sub>-CH<sub>2</sub>-CH<sub>3</sub>, 66.08; C=O-O, 164.58 C=O-NH-(2,4-dimethyl-phenyl), 125.09, 127.25, 131.62, 132.11, 132.49, 135.93; C=O-NH-(2,4-dimethyl-phenyl) 18.17, 20.87; C=O, 157.84 QX(C3) CH<sub>3</sub>, 14.73; QX(ring), 121.62, 121.68, 130.40, 131.07, 133.52, 137.55, 139.03, 139.70.

**T-145:** 2-(methyl-carbonyl)-3-methyl-quinoxaline-7-butylcarboxylate-1,4-di-*N*-oxide. This compound obtained a 2.37 % yield. FT IR (ν cm<sup>-1</sup>): 1323.15 (*N*-Oxide); 2900-3000 (ArC-H); 2900-2800 (C-H); 1727.03, 1700.97 (C=O); 1160-1300 ((C=O)-C-O). <sup>1</sup>H-NMR (400 MHz, DMSO-*d*<sub>6</sub>) δ ppm: 1H-NMR: CH<sub>2</sub>-CH<sub>2</sub>-CH<sub>2</sub>-CH<sub>3</sub>, t, 0.98, 3H; CH<sub>2</sub>-CH<sub>2</sub>-CH<sub>2</sub>-CH<sub>3</sub>, m, 1.47, 2H; CH<sub>2</sub>-CH<sub>2</sub>-CH<sub>2</sub>-CH<sub>3</sub>, m, 1.78, 2H; CH<sub>2</sub>-CH<sub>2</sub>-CH<sub>2</sub>-CH<sub>3</sub>, t, 4.40, 2H; C=O-methyl, s, 2.67, 3H; QX(C3) CH<sub>3</sub>, s, 2.40, 3H; QX(ring), dd, 8.41, 1H; d, 8.64, 1H; ds, 9.01, 1H. <sup>13</sup>C-NMR (400 MHz, DMSO-*d*<sub>6</sub>) δ ppm: 13C-NMR: CH<sub>2</sub>-CH<sub>2</sub>-CH<sub>2</sub>-CH<sub>3</sub>, 14.02; CH<sub>2</sub>-CH<sub>2</sub>-CH<sub>2</sub>-CH<sub>3</sub>, 19.18; CH<sub>2</sub>-CH<sub>2</sub>-CH<sub>2</sub>-CH<sub>3</sub>, 30.60; CH<sub>2</sub>-CH<sub>2</sub>-CH<sub>2</sub>-CH<sub>3</sub>, 66.06; C=O-O, 164.58; C=O-methyl, 29.96; C=O, 195.61; QX(ring), 121.22, 121.58, 130.93, 133.48, 137.86, 138.88, 139.73, 141.15

**T-146:** 2-(tert-butyl-carbonyl)-3-trifluoromethyl-quinoxaline-7-butylcarboxylate-1,4-di-*N*-oxide. This compound obtained a 1.02 % yield. FT IR (ν cm<sup>-1</sup>): 1320 (*N*-Oxide); 2900-3000 (ArC-H); 2900-2800 (C-H); 1709.65 (C=O); 1300-1160 ((C=O)-C-O); 1247-1154 (C-F). <sup>1</sup>H-NMR (400 MHz, DMSO-*d*<sub>6</sub>) δ ppm: 1H-NMR: CH<sub>2</sub>-CH<sub>2</sub>-CH<sub>2</sub>-CH<sub>3</sub>, t, 0.97, 3H; CH<sub>2</sub>-CH<sub>2</sub>-CH<sub>2</sub>-CH<sub>3</sub>, m, 1.47, 2H; CH<sub>2</sub>-CH<sub>2</sub>-CH<sub>2</sub>-CH<sub>3</sub>, m, 1.78, 2H; CH<sub>2</sub>-CH<sub>2</sub>-CH<sub>2</sub>-CH<sub>3</sub>, t, 4.42, 2H; C=O-t-butyl, s, 1.24, 9H; QX(ring), dd, 8.45, 1H; d, 8.62, 1H; ds, 8.90, 1H. <sup>13</sup>C-NMR (400 MHz, DMSO-*d*<sub>6</sub>) δ ppm: 13C-NMR: CH<sub>2</sub>-CH<sub>2</sub>-CH<sub>2</sub>-CH<sub>3</sub>, 14.01; CH<sub>2</sub>-CH<sub>2</sub>-CH<sub>2</sub>-CH<sub>3</sub>, 19.17; CH<sub>2</sub>-CH<sub>2</sub>-CH<sub>2</sub>-CH<sub>3</sub>, 30.57; CH<sub>2</sub>-CH<sub>2</sub>-CH<sub>2</sub>-CH<sub>3</sub>, 66.22; C=O-O, 164.34; QX(ring), 121.74, 121.77, 130.72, 132.16, 134.32, 139.65, 141.15.

**T-147:** 2-(2-naphthyl-carbonyl)-3-trifluoromethyl-quinoxaline-7-butylcarboxylate-1,4-di-*N*-oxide. This compound obtained a 1.17 % yield. FT IR (ν cm<sup>-1</sup>): 1337.80 (*N*-Oxide); 2900-3000 (ArC-H); 2900-2800 (C-H); 1725.93, 1674.96 (C=O); 1300-1160 ((C=O)-C-O); 1259-1156 (C-F). <sup>1</sup>H-NMR (400 MHz, DMSO-*d*<sub>6</sub>) δ ppm: 1H-NMR: CH<sub>2</sub>-CH<sub>2</sub>-CH<sub>2</sub>-CH<sub>3</sub>, t, 0.99, 3H; CH<sub>2</sub>-CH<sub>2</sub>-CH<sub>2</sub>-CH<sub>3</sub>, m, 1.50, 2H; CH<sub>2</sub>-CH<sub>2</sub>-CH<sub>2</sub>-CH<sub>3</sub>, m, 1.80, 2H; CH<sub>2</sub>-CH<sub>2</sub>-CH<sub>2</sub>-CH<sub>3</sub>, t, 4.45, 2H; C=O-naphthyl, t, 7.75, 1H; t, 7.65, 1H; d, 8.06, 1H; d, 8.01, 1H; d, 9.03, 1H; ds, 8.14, 1H; QX(ring), dd, 8.53, 1H; d, 8.62, 1H; ds, 8.95, 1H. <sup>13</sup>C-NMR (400 MHz, DMSO-*d*<sub>6</sub>) δ ppm: 13C-NMR: CH<sub>2</sub>-CH<sub>2</sub>-CH<sub>2</sub>-CH<sub>3</sub>, 14.02; CH<sub>2</sub>-CH<sub>2</sub>-CH<sub>2</sub>-CH<sub>3</sub>, 19.19; CH<sub>2</sub>-CH<sub>2</sub>-CH<sub>2</sub>-CH<sub>3</sub>, 30.58; CH<sub>2</sub>-CH<sub>2</sub>-CH<sub>2</sub>-CH<sub>3</sub>, 66.32; C=O-O, 164.28; CF<sub>3</sub>, C=O-naphthyl, 123.45, 127.95, 128.45, 129.71, 131.32, 131.89, 134.21, 136.51; C=O, 184.40; QX(ring), 121.63, 121.80, 130.11, 132.82, 133.14, 139.09, 139.65, 141.27.

**T-148:** 2-(benzyloxy-carbonyl)-3-methyl-quinoxaline-7-butylcarboxylate-1,4-di-*N*-oxide. This compound obtained a 1.38 % yield. FT IR (ν cm<sup>-1</sup>): 1331.49 (*N*-Oxide); 2900-3000 (ArC-H); 2900-2800 (C-H); 1749.31, 1719.50 (C=O); 1300-1160 ((C=O)-C-O). <sup>1</sup>H-NMR (400 MHz, DMSO-*d*<sub>6</sub>) δ ppm: 1H-NMR: CH<sub>2</sub>-CH<sub>2</sub>-CH<sub>2</sub>-CH<sub>3</sub>, t, 0.97, 3H; CH<sub>2</sub>-CH<sub>2</sub>-CH<sub>2</sub>-CH<sub>3</sub>, m, 1.47, 2H; CH<sub>2</sub>-CH<sub>2</sub>-CH<sub>2</sub>-CH<sub>3</sub>, m, 1.77, 2H; CH<sub>2</sub>-CH<sub>2</sub>-CH<sub>2</sub>-CH<sub>3</sub>, t, 4.40, 2H; C=O-O(CH<sub>2</sub>)-phenyl, m, 7.6-7.1, 5H; C=O-

O(CH<sub>2</sub>)-phenyl, s, 5.56, 2H; QX(C3) CH<sub>3</sub>, s, 2.42, 3H; QX(ring), dd, 8.37, 1H; d, 8.55, 1H; ds, 8.93, 1H. <sup>13</sup>C-NMR (400 MHz, DMSO-*d*<sub>6</sub>) δ ppm: 13C-NMR (ppm): CH<sub>2</sub>-CH<sub>2</sub>-CH<sub>2</sub>-CH<sub>3</sub>, 13.74; CH<sub>2</sub>-CH<sub>2</sub>-CH<sub>2</sub>-CH<sub>3</sub>, 19.23; CH<sub>2</sub>-CH<sub>2</sub>-CH<sub>2</sub>-CH<sub>3</sub>, 30.64; CH<sub>2</sub>-CH<sub>2</sub>-CH<sub>2</sub>-CH<sub>3</sub>, 66.22; C=O-O-, 164.32 C=O-O-CH<sub>2</sub>-phenyl 69.34, C=O-O-CH<sub>2</sub>-phenyl, 121.07; C=O-O-, 159.47 QX(C3) CH<sub>3</sub>, 14.26; QX (ring), 130.89, 131.33, 132.44, 133.98, 134.43, 137.79, 138.71, 139.77.

**T-153:** 2-(methyl-carbonyl)-3-trifluoromethyl-quinoxaline-7-butylcarboxylate-1,4-di-*N*-oxide. This compound obtained a 6.72 % yield. FT IR (ν cm<sup>-1</sup>): 1339.19 (*N*-Oxide); 2900-3000 (ArC-H); 2900-2800 (C-H); 1725.95, 1713.52 (C=O); 1160-1300 ((C=O)-C-O) 1234-1176 (C-F). <sup>1</sup>H-NMR: CH<sub>2</sub>-CH<sub>2</sub>-CH<sub>2</sub>-CH<sub>3</sub>, t, 0.98, 3H; CH<sub>2</sub>-CH<sub>2</sub>-CH<sub>2</sub>-CH<sub>3</sub>, m, 1.48, 2H; CH<sub>2</sub>-CH<sub>2</sub>-CH<sub>2</sub>-CH<sub>3</sub>, m, 1.78, 2H; CH<sub>2</sub>-CH<sub>2</sub>-CH<sub>2</sub>-CH<sub>3</sub>, t, 4.40, 2H; C=O-methyl, s, 2.63, 3H; QX(ring), dd, 8.52, 1H; d, 8.59, 1H; ds, 8.93, 1H. <sup>13</sup>C-NMR (400 MHz, DMSO-*d*<sub>6</sub>) δ ppm: 13C-NMR (ppm): CH<sub>2</sub>-CH<sub>2</sub>-CH<sub>2</sub>-CH<sub>3</sub>, 14.01; CH<sub>2</sub>-CH<sub>2</sub>-CH<sub>2</sub>-CH<sub>3</sub>, 19.18; CH<sub>2</sub>-CH<sub>2</sub>-CH<sub>2</sub>-CH<sub>3</sub>, 30.56; CH<sub>2</sub>-CH<sub>2</sub>-CH<sub>2</sub>-CH<sub>3</sub>, 66.28; C=O-O-, 164.21 C=O-CH<sub>3</sub>, 29.64; QX(ring), 121.41, 121.65, 133.45, 134.14, 138.96, 140.13, 140.80.

**T-154:** 2-(etoxy-carbonyl)-3-trifluoromethyl-quinoxaline-7-butylcarboxylate-1,4-di-*N*-oxide. This compound obtained a 6.21 % yield. FT IR (ν cm<sup>-1</sup>): 1346.81 (*N*-Oxide); 2900-3000 (ArC-H); 2900-2800 (C-H); 1744.39, 1729.69 (C=O); 1160-1300 ((C=O)-C-O), 1225-1156 (C-F). <sup>1</sup>H-NMR: CH<sub>2</sub>-CH<sub>2</sub>-CH<sub>2</sub>-CH<sub>3</sub>, t, 0.98, 3H; CH<sub>2</sub>-CH<sub>2</sub>-CH<sub>2</sub>-CH<sub>3</sub>, m, 1.48, 2H; CH<sub>2</sub>-CH<sub>2</sub>-CH<sub>2</sub>-CH<sub>3</sub>, m, 1.78, 2H; CH<sub>2</sub>-CH<sub>2</sub>-CH<sub>2</sub>-CH<sub>3</sub>, t, 4.42, 2H; C=O-O(CH<sub>2</sub>CH<sub>3</sub>), t, 1.36, 3H; C=O-O(CH<sub>2</sub>CH<sub>3</sub>), q, 4.51, 2H; QX(ring), dd, 8.51, 1H; d, 8.57, 1H; ds, 8.90, 1H. <sup>13</sup>C-NMR (400 MHz, DMSO-*d*<sub>6</sub>) δ ppm: 13C-NMR (ppm): CH<sub>2</sub>-CH<sub>2</sub>-CH<sub>2</sub>-CH<sub>3</sub>, 14.00; CH<sub>2</sub>-CH<sub>2</sub>-CH<sub>2</sub>-CH<sub>3</sub>, 19.17; CH<sub>2</sub>-CH<sub>2</sub>-CH<sub>2</sub>-CH<sub>3</sub>, 30.56; CH<sub>2</sub>-CH<sub>2</sub>-CH<sub>2</sub>-CH<sub>3</sub>, 66.27; C=O-O-, 164.20; C=O-O(CH<sub>2</sub>CH<sub>3</sub>), 14.07; C=O-O(CH<sub>2</sub>CH<sub>3</sub>), 64.27; C=O-O-, 158.13; QX(ring), 120.70, 121.65, 121.74, 133.50, 134.35, 135.03, 139.39, 140.87.

**T-155:** 2-(methyl-carbonyl)-3-trifluoromethyl-quinoxaline-7-isobutylcarboxylate-1,4-di-*N*-oxide. This compound obtained a: 4.8 % yield. FT IR (ν cm<sup>-1</sup>): 1334 (*N*-Oxide), 2962-3093 (ArC-H), 1721 (C=O), 1282-1152 (Ar-CF<sub>3</sub>) cm<sup>-1</sup>. OSS-001. <sup>1</sup>H-NMR (400 MHz, DMSO-*d*<sub>6</sub>) δ ppm: CH<sub>2</sub>CH(CH<sub>3</sub>)<sub>2</sub>, d, 1.02, 6H; CH<sub>2</sub>CH(CH<sub>3</sub>)<sub>2</sub>, m, 2.10, 1H; CH<sub>2</sub>CH(CH<sub>3</sub>)<sub>2</sub>, d, 4.21, 2H; C=O-CH<sub>3</sub>, s, 2.63, 3H; QX (ring), dd, 8.53, 1H; d 8.59, 1H; ds, 8.93, 1H. <sup>13</sup>C-RMN (400 MHz, DMSO-*d*<sub>6</sub>) δ ppm: CH<sub>2</sub>CH(CH<sub>3</sub>)<sub>2</sub>, 19.32; CH<sub>2</sub>CH(CH<sub>3</sub>)<sub>2</sub>, 29.65; CH<sub>2</sub>CH(CH<sub>3</sub>)<sub>2</sub>, 72.15; CF<sub>3</sub>- QX(ring), 121.46, 121.64, 133.46, 134.10, 138.98, 140.14, 140.98; C=O-CH<sub>3</sub>, 27.81; C=O-O-, 164.16; C=O-CH<sub>3</sub>, 191.77.

**T-156:** 2-(phenyl-carbonyl)-3-trifluoromethyl-quinoxaline-7-isobutylcarboxylate-1,4-di-*N*-oxide. This compound obtained a: 2.7 % yield. FT IR (ν cm<sup>-1</sup>): 1338 (*N*-Oxide), 2876-3095 (ArC-H), 1721, 1689 (C=O), 1285-1132 (Ar-CF<sub>3</sub>) cm<sup>-1</sup>. <sup>1</sup>H-RMN (400MHz, DMSO-*d*<sub>6</sub>) δ ppm: CH<sub>2</sub>CH(CH<sub>3</sub>)<sub>2</sub>, d, 1.03, 6H; CH<sub>2</sub>CH(CH<sub>3</sub>)<sub>2</sub>, m, 2.18, 1H; CH<sub>2</sub>CH(CH<sub>3</sub>)<sub>2</sub>, d, 4.25, 2H; C=O-phenyl, t, 7.47, 1H; d, 7.64, 2H; d, 7.81, 2H; QX (ring), d, 8.16, 1H; d, 8.52, 1H; s, 8.99, 1H. <sup>13</sup>C-RMN (400MHz, DMSO-*d*<sub>6</sub>) δ ppm: CH<sub>2</sub>CH(CH<sub>3</sub>)<sub>2</sub>, 19.05; CH<sub>2</sub>CH(CH<sub>3</sub>)<sub>2</sub>, 27.83; CH<sub>2</sub>CH(CH<sub>3</sub>)<sub>2</sub>, 72.15; CF<sub>3</sub>- QX(ring), 121.55, 121.74, 127.68, 129.21, 129.90, 133.38, 135.90, 141.25.; C=O-O-, 164.23; C=O-phenyl, 184.52.

**T-157:** 2-(naphthyl-carbonyl)-3-trifluoromethyl-quinoxaline-7-isobutylcarboxylate-1,4-di-*N*-oxide. This compound obtained a: 5.0 % yield. FT IR (ν cm<sup>-1</sup>): 1339 (*N*-Oxide), 2875-3095 (ArC-H), 1722, 1687 (C=O), 1339, 1170-1125 (Ar-CF<sub>3</sub>) cm<sup>-1</sup>. <sup>1</sup>H-RMN (400 MHz, DMSO-*d*<sub>6</sub>) δ ppm: CH<sub>2</sub>CH(CH<sub>3</sub>)<sub>2</sub>, d, 1.04, 6H; CH<sub>2</sub>CH(CH<sub>3</sub>)<sub>2</sub>, m, 2.14, 1H; CH<sub>2</sub>CH(CH<sub>3</sub>)<sub>2</sub>, d, 4.24, 2H; C=O-naphthyl, s, 8.85, 1H; d, 8.86, 1H; d, 8.54, 1H; d, 8.08, 1H; d, 8.01, 1H; t, 7.75, 1H; t, 7.68, 1H; QX (ring), d, 8.14, 1H; d, 8.57 1H; s, 9.04, 1H. <sup>13</sup>C-RMN (400 MHz, DMSO-*d*<sub>6</sub>) δ ppm: CH<sub>2</sub>CH(CH<sub>3</sub>)<sub>2</sub>, 19.32; CH<sub>2</sub>CH(CH<sub>3</sub>)<sub>2</sub>, 27.84; CH<sub>2</sub>CH(CH<sub>3</sub>)<sub>2</sub>, 72.16; CF<sub>3</sub>- QX(ring), 121.68, 121.90, 123.45, 127.95, 129.78, 132.82, 134.18, 141.29; C=O-O-, 164.24; C=O-naphthyl, 184.39.

**T-158:** 2-(phenyl-carbonyl)-3-methyl-quinoxaline-7-isobutylcarboxylate-1,4-di-*N*-oxide. This compound obtained a: 20 % yield FT IR (ν cm<sup>-1</sup>): 1322 (*N*-Oxide), 2970-3101 (ArC-H), 1726, 1675 (C=O), 1322 cm<sup>-1</sup>. <sup>1</sup>H-RMN (400 MHz, DMSO-*d*<sub>6</sub>) δ ppm: CH<sub>2</sub>CH(CH<sub>3</sub>)<sub>2</sub>, d, 1.04, 6H; CH<sub>2</sub>CH(CH<sub>3</sub>)<sub>2</sub>, m, 2.34, 1H; CH<sub>2</sub>CH(CH<sub>3</sub>)<sub>2</sub>, d, 4.22, 2H; CH<sub>3</sub>-QX, s, 2.46, 3H; C=O-phenyl, t, 7.58, 3H; d, 8.10, 2H; d, 8.45, 2H; QX (ring), d, 8.64, 1H; d, 8.86, 1H; s, 9.00, 1H. <sup>13</sup>C-RMN (400 MHz, DMSO-*d*<sub>6</sub>) δ ppm: CH<sub>2</sub>CH(CH<sub>3</sub>)<sub>2</sub>, 19.34; CH<sub>2</sub>CH(CH<sub>3</sub>)<sub>2</sub>, 27.85; CH<sub>2</sub>CH(CH<sub>3</sub>)<sub>2</sub>, 71.96; CH<sub>3</sub>-QX (ring), 14.30; QX(ring), 121.34, 121.68, 130.84, 133.40, 134.55, 135.92, 138.47, 139.31; C=O-O-, 164.60; C=O-phenyl, 187.42.

**T-159.** 2-methyl-3-(phenyl-carbonyl)-quinoxaline-7-isobutylcarboxylate-1,4-di-*N*-oxide. This compound obtained a: 10.5 % yield. FT IR ( $\nu$   $\text{cm}^{-1}$ ): 1322 (N-Oxide), 2874-3110 (ArC-H), 1718, 1685 (C=O)  $\text{cm}^{-1}$ .  $^1\text{H}$ -RMN (400 MHz, DMSO-*d*<sub>6</sub>)  $\delta$  ppm:  $\text{CH}_2\text{CH}(\text{CH}_3)_2$ , d, 1.05, 6H;  $\text{CH}_2\text{CH}(\text{CH}_3)_2$ , m, 2.34, 1H;  $\text{CH}_2\text{CH}(\text{CH}_3)_2$ , d, 4.23, 2H; QX-phenyl, t, 7.60, 1H; d, 7.58, 2H; d, 8.10, 2H; QX (ring), d, 8.41, 1H; d, 8.53, 1H; s, 9.03, 1H.  $^{13}\text{C}$ -RMN (400 MHz, DMSO-*d*<sub>6</sub>)  $\delta$  ppm:  $\text{CH}_2\text{CH}(\text{CH}_3)_2$ , 19.45;  $\text{CH}_2\text{CH}(\text{CH}_3)_2$ , 27.91;  $\text{CH}_2\text{CH}(\text{CH}_3)_2$ , 72.00; C=O-CH<sub>3</sub>, 30.20; C=O-O-, 164.19; C=O-CH<sub>3</sub>, 187.42; QX(ring), 121.35, 121.54, 128.97, 130.39, 131.58, 133.52, 135.91, 140.43.

**T-161.** 2-(thienyl-2-carbonyl)-3-trifluoromethyl-quinoxaline-7-isobutylcarboxylate-1,4-di-*N*-oxide. This compound obtained a: 4.1 % yield. FT IR ( $\nu$   $\text{cm}^{-1}$ ): 1358 (N-Oxide), 2959 (ArC-H), 1720, 1657 (C=O), 1155 (Ar-CF<sub>3</sub>)  $\text{cm}^{-1}$ . OSS-015.  $^1\text{H}$ -RMN (400 MHz, DMSO-*d*<sub>6</sub>)  $\delta$  ppm:  $\text{CH}_2\text{CH}(\text{CH}_3)_2$ , d, 1.05, 6H;  $\text{CH}_2\text{CH}(\text{CH}_3)_2$ , m, 2.18, 1H;  $\text{CH}_2\text{CH}(\text{CH}_3)_2$ , d, 4.24, 2H; C=O-thienyl, s, 7.32, 1H; ds, 8.22-8.30, 2H; QX (ring), m, 8.58, 2H; s, 8.99, 1H.  $^{13}\text{C}$ -RMN (400 MHz, DMSO-*d*<sub>6</sub>)  $\delta$  ppm:  $\text{CH}_2\text{CH}(\text{CH}_3)_2$ , 19.32;  $\text{CH}_2\text{CH}(\text{CH}_3)_2$ , 27.83;  $\text{CH}_2\text{CH}(\text{CH}_3)_2$ , 72.15; CF<sub>3</sub>- QX(ring), 121.69, 121.73, 129.92, 133.38, 134.16, 138.43, 139.02, 139.63; C=O-O-, 164.22; C=O-thiophenyl, 176.29.

**T-162.** 2-(benzyloxy-carbonyl)-3-methyl-quinoxaline-7-isobutylcarboxylate-1,4-di-*N*-oxide. This compound obtained a: 4.0 % yield. FT IR ( $\nu$   $\text{cm}^{-1}$ ): 1330 (N-Oxide), 2960-2892 (ArC-H), 1752, 1723 (C=O)  $\text{cm}^{-1}$ .  $^1\text{H}$ -NMR (400 MHz, DMSO-*d*<sub>6</sub>)  $\delta$  ppm: 1H:  $\text{CH}_2\text{CH}(\text{CH}_3)_2$ , d, 1.06, 6H;  $\text{CH}_2\text{CH}(\text{CH}_3)_2$ , m, 2.15, 1H;  $\text{CH}_2\text{CH}(\text{CH}_3)_2$ , d, 4.23, 2H; C=O-O(CH<sub>2</sub>)-phenyl, t, 7.25 1H, t, 7.42 2H, d, 7.51 2H; C=O-O(CH<sub>2</sub>)-phenyl, s, 5.56, 2H; QX(C3) CH<sub>3</sub>, s, 2.50, 3H; QX(ring), d, 8.45, 1H; d, 8.65, 1H; s, 9.25, 1H.  $^{13}\text{C}$ -NMR (400 MHz, DMSO-*d*<sub>6</sub>)  $\delta$  ppm:  $^{13}\text{C}$ -NMR (ppm):  $\text{CH}_2\text{CH}(\text{CH}_3)_2$ , 19.16;  $\text{CH}_2\text{CH}(\text{CH}_3)_2$ , 27.87;  $\text{CH}_2\text{CH}(\text{CH}_3)_2$ , 72.26; C=O-O, 164.26 C=O-O-CH<sub>2</sub>-phenyl 69.34, C=O-O-CH<sub>2</sub>-phenyl, 121.08, 122.30, 128, 128.80 ; C=O-O, 159.47 QX(C3) CH<sub>3</sub>, 14.20; QX (ring), 137.8, 134.45, 133.98, 131.34, 129.16, 128.90, 128.87.

**T-163.** 2-(2,4-dimethylphenyl-carbamoyl)-3-methyl-quinoxaline-7-isobutylcarboxylate-1,4-di-*N*-oxide. This compound obtained a: 3.7 % yield. FT IR ( $\nu$   $\text{cm}^{-1}$ ): 1374 (N-Oxide), 3349 (N-H), 2957-2873 (ArC-H), 1717, 1695 (C=O)  $\text{cm}^{-1}$ .  $^1\text{H}$ -NMR (400 MHz, DMSO-*d*<sub>6</sub>)  $\delta$  ppm: 1H:  $\text{CH}_2\text{CH}(\text{CH}_3)_2$ , d, 1.08, 6H;  $\text{CH}_2\text{CH}(\text{CH}_3)_2$ , m, 2.18, 1H;  $\text{CH}_2\text{CH}(\text{CH}_3)_2$ , d, 4.24, 2H; C=O-NH-(4-Cl-phenyl), d, 7.88, 2H; d, 7.99, 2H; C=O-NH s, 10.74, 1H; QX(C3) CH<sub>3</sub>, s, 2.43, 3H; QX(ring), d, 8.45, 1H; d, 8.69, 1H; s, 9.26, 1H.  $^{13}\text{C}$ -NMR (400 MHz, DMSO-*d*<sub>6</sub>)  $\delta$  ppm:  $\text{CH}_2\text{CH}(\text{CH}_3)_2$ , 19.18;  $\text{CH}_2\text{CH}(\text{CH}_3)_2$ , 27.86;  $\text{CH}_2\text{CH}(\text{CH}_3)_2$ , 72.26; C=O-O, 164.22 C=O-NH-(2,4-dimethyl-phenyl), 123.11, 127.34, 131.64, 134.39, 135.91, 137.37; C=O-NH-(2,4-dimethyl-phenyl) 18.11, 20.98; C=O, 159.90 QX(C3) CH<sub>3</sub>, 15.83; QX(ring), 121.22, 122.34, 129.74, 131.41, 132.20, 137.14, 138.20, 144.50.

**T-164.** 2-methyl-3-(2,4-dimethylphenyl-carbamoyl)-quinoxaline-7-isobutylcarboxylate-1,4-di-*N*-oxide. This compound obtained a: 2.3 % yield. FT IR ( $\nu$   $\text{cm}^{-1}$ ): 1335 (N-Oxide), 3103 (N-H), 2960-2872 (ArC-H), 1725, 1664 (C=O) 1335  $\text{cm}^{-1}$ .  $^1\text{H}$ -NMR (400 MHz, DMSO-*d*<sub>6</sub>)  $\delta$  ppm: 1H:  $\text{CH}_2\text{CH}(\text{CH}_3)_2$ , d, 1.11, 6H;  $\text{CH}_2\text{CH}(\text{CH}_3)_2$ , m, 2.18, 1H;  $\text{CH}_2\text{CH}(\text{CH}_3)_2$ , d, 4.24, 2H; C=O-NH-(4-Cl-phenyl), d, 7.08, 2H; d, 7.88, 2H; C=O-NH s, 9.94, 1H; QX(C2) CH<sub>3</sub>, s, 2.36, 3H; QX(ring), d, 8.17, 1H; d, 8.39, 1H; s, 8.83, 1H.  $^{13}\text{C}$ -NMR (400 MHz, DMSO-*d*<sub>6</sub>)  $\delta$  ppm:  $\text{CH}_2\text{CH}(\text{CH}_3)_2$ , 19.23;  $\text{CH}_2\text{CH}(\text{CH}_3)_2$ , 27.92;  $\text{CH}_2\text{CH}(\text{CH}_3)_2$ , 71.86; C=O-O, 165.58 C=O-NH-(2,4-dimethyl-phenyl), 128.78, 129.44, 131.29, 132.94, 133.29, 140.89; C=O-NH-(2,4-dimethyl-phenyl) 17.78, 20.95; C=O, 161.67 QX(C2) CH<sub>3</sub>, 25.12; QX(ring), 121.95, 127.44, 130.89, 131.19 131.79, 134.95, 142.41, 144.66.

**T-165.** 2-(*p*-chlorophenyl-carbamoyl)-3-methyl-quinoxaline-7-isobutylcarboxylate-1,4-di-*N*-oxide. This compound obtained a: 14 % yield. FT IR ( $\nu$   $\text{cm}^{-1}$ ): 1342 (N-Oxide), 3245-3188 (N-H), 2965-2873 (ArC-H), 1722, 1685 (C=O), 829 (Ar-Cl)  $\text{cm}^{-1}$ .  $^1\text{H}$ -RMN (400 MHz, DMSO-*d*<sub>6</sub>)  $\delta$  ppm:  $\text{CH}_2\text{CH}(\text{CH}_3)_2$ , d, 1.05, 6H;  $\text{CH}_2\text{CH}(\text{CH}_3)_2$ , m, 2.16, 1H;  $\text{CH}_2\text{CH}(\text{CH}_3)_2$ , d, 4.22, 2H; CH<sub>3</sub>-QX, s, 2.53, 3H; C=O-NH-4-Cl-phenyl, d, 7.58, 2H; d, 7.69, 2H; QX (ring), d, 8.44, 1H; d, 8.62, 1H; s, 9.02, 1H; C=O-NH-, s, 11.12, 1H.  $^{13}\text{C}$ -RMN (400 MHz, DMSO-*d*<sub>6</sub>)  $\delta$  ppm:  $\text{CH}_2\text{CH}(\text{CH}_3)_2$ , 19.36;  $\text{CH}_2\text{CH}(\text{CH}_3)_2$ , 27.84;  $\text{CH}_2\text{CH}(\text{CH}_3)_2$ , 72.00; CH<sub>3</sub>-QX (ring), 14.71; C=O-OCH<sub>2</sub>CH(CH<sub>3</sub>)<sub>2</sub>, 157.09; C=O-NH-, 164.50; QX(ring), 121.66, 121.73, 128.95, 129.58, 131.21, 133.64, 139.95, 140.47.

**T-166.** 2-(methyl-carbonyl)-3-methyl-quinoxaline-7-isobutylcarboxylate-1,4-di-*N*-oxide. This compound obtained a: 13.4 % yield. FT IR ( $\nu$   $\text{cm}^{-1}$ ): 1328 (N-oxide), 2962 (ArC-H), 1716 (C=O)  $\text{cm}^{-1}$ .  $^1\text{H}$ -RMN (400 MHz, DMSO-*d*<sub>6</sub>)  $\delta$  ppm:  $\text{CH}_2\text{CH}(\text{CH}_3)_2$ , d, 1.04, 6H;  $\text{CH}_2\text{CH}(\text{CH}_3)_2$ , m, 2.17, 1H;  $\text{CH}_2\text{CH}(\text{CH}_3)_2$ , d, 4.21, 2H; CH<sub>3</sub>-QX (ring), s, 2.67, 3H; C=O-CH<sub>3</sub>, s, 2.40, 3H; QX (ring), d, 8.40, 1H; d 8.58, 1H; s, 8.96, 1H.  $^{13}\text{C}$ -RMN (400 MHz, DMSO-*d*<sub>6</sub>)  $\delta$  ppm:  $\text{CH}_2\text{CH}(\text{CH}_3)_2$ , 14.00;

CH<sub>2</sub>CH(CH<sub>3</sub>)<sub>2</sub>, 19.34; CH<sub>2</sub>CH(CH<sub>3</sub>)<sub>2</sub>, 71.96; CH<sub>3</sub>-QX (ring), 27.83; C=O-CH<sub>3</sub>, 29.96; C=O-O-, 164.52; C=O-CH<sub>3</sub>, 195.61; QX(ring), 121.26, 121.58, 130.92, 133.45, 137.87, 138.91, 139.75, 141.16.

**T-167.** 2-(phenyl-carbamoyl)-3-phenyl-quinoxaline-7-isobutylcarboxylate-1,4-di-*N*-oxide. This compound obtained a: 3.5 % yield. FT IR ( $\nu$  cm<sup>-1</sup>): 1333 (N-Oxide), 3198 (N-H), 2961 (ArC-H), 1723, 1685 (C=O), cm<sup>-1</sup>. <sup>1</sup>H-RMN (400 MHz, DMSO-d<sub>6</sub>)  $\delta$  ppm: CH<sub>2</sub>CH(CH<sub>3</sub>)<sub>2</sub>, d, 1.05, 6H; CH<sub>2</sub>CH(CH<sub>3</sub>)<sub>2</sub>, m, 2.16, 1H; CH<sub>2</sub>CH(CH<sub>3</sub>)<sub>2</sub>, d, 4.24, 2H; QX-phenyl, t, 7.23, 1H; d, 7.38, 2H; d, 7.33, 2H; C=O-NH-phenyl, t, 7.17, 1H; d, 7.62, 2H; d, 7.31, 2H; QX (ring), d, 8.51, 1H; d, 8.69, 1H; s, 9.06, 1H; C=O-NH-, s, 10.79, 1H. <sup>13</sup>C-RMN (400 MHz, DMSO-d<sub>6</sub>)  $\delta$  ppm: CH<sub>2</sub>CH(CH<sub>3</sub>)<sub>2</sub>, 19.35; CH<sub>2</sub>CH(CH<sub>3</sub>)<sub>2</sub>, 27.84; CH<sub>2</sub>CH(CH<sub>3</sub>)<sub>2</sub>, 72.02; C=O-O-, 156.70; C=O-NH-, 164.49; QX(ring), 121.76, 122.28, 128.71, 129.47, 130.25, 133.70, 137.97, 139.53.

**T-168.** 2-(furyl-carbonyl)-3-trifluoromethyl-quinoxaline-7-isobutylcarboxylate-1,4-di-*N*-oxide. This compound obtained a: 9.0 % yield. FT IR ( $\nu$  cm<sup>-1</sup>): 1339 (N-Oxide), 2962-2876 (ArC-H), 1722, 1665 (C=O), cm<sup>-1</sup>. <sup>1</sup>H-RMN (400 MHz, DMSO-d<sub>6</sub>)  $\delta$  ppm: CH<sub>2</sub>CH(CH<sub>3</sub>)<sub>2</sub>, d, 1.05, 6H; CH<sub>2</sub>CH(CH<sub>3</sub>)<sub>2</sub>, m, 2.13, 1H; CH<sub>2</sub>CH(CH<sub>3</sub>)<sub>2</sub>, d, 4.24, 2H; C=O-furyl, s, 6.84, 1H; s, 7.89, 1H; s, 8.24, 1H; QX (ring), c, 8.59, 2H; s, 8.99, 1H. <sup>13</sup>C-RMN (400 MHz, DMSO-d<sub>6</sub>)  $\delta$  ppm: CH<sub>2</sub>CH(CH<sub>3</sub>)<sub>2</sub>, 19.34; CH<sub>2</sub>CH(CH<sub>3</sub>)<sub>2</sub>, 27.82; CH<sub>2</sub>CH(CH<sub>3</sub>)<sub>2</sub>, 72.16; CF<sub>3</sub>- QX(ring), 121.71, 121.75, 124.62, 133.44, 134.16, 137.74, 139.61, 141.25; C=O-O-, 164.19; C=O-furyl, 170.16.

**T-169.** 2-(phenyl-carbamoyl)-3-methyl-quinoxaline-7-isobutylcarboxylate-1,4-di-*N*-oxide. This compound obtained a: 22.5 % yield. FT IR ( $\nu$  cm<sup>-1</sup>): 3261 cm<sup>-1</sup>: 1375 (N-Oxide), 3260 (N-H), 2960-2874 (ArC-H), 1720, 1677 (C=O) cm<sup>-1</sup>. <sup>1</sup>H-RMN (400 MHz, DMSO-d<sub>6</sub>)  $\delta$  ppm: CH<sub>2</sub>CH(CH<sub>3</sub>)<sub>2</sub>, d, 1.05, 6H; CH<sub>2</sub>CH(CH<sub>3</sub>)<sub>2</sub>, m, 2.16, 1H; CH<sub>2</sub>CH(CH<sub>3</sub>)<sub>2</sub>, d, 4.23, 2H; CH<sub>3</sub>-QX, s, 2.54, 3H; C=O-NH-phenyl, t, 7.57, 1H; d, 7.41, 2H; d, 7.69, 1H; QX (ring), d, 8.44, 1H; d, 8.65, 1H; s, 9.03, 1H; C=O-NH-, s, 10.96, 1H. <sup>13</sup>C-RMN (400 MHz, DMSO-d<sub>6</sub>)  $\delta$  ppm: CH<sub>2</sub>CH(CH<sub>3</sub>)<sub>2</sub>, 19.36; CH<sub>2</sub>CH(CH<sub>3</sub>)<sub>2</sub>, 14.72; CH<sub>2</sub>CH(CH<sub>3</sub>)<sub>2</sub>, 27.84; CH<sub>3</sub>-QX (ring), 14.91; C=O-O-, 157.30; C=O-NH-, 164.52; QX(ring), 121.65, 121.72, 125.24, 129.63, 131.16, 133.58, 138.27, 140.42.

**T-170.** 2-(methoxy-carbonyl)-3-methyl-quinoxaline-7-isobutylcarboxylate-1,4-di-*N*-oxide. This compound obtained a: 4.3 % yield. FT IR ( $\nu$  cm<sup>-1</sup>): 1327 (N-oxide), 2959-3099 (ArC-H), 1744, 1718 (C=O), 1327 cm<sup>-1</sup>. <sup>1</sup>H-RMN (400 MHz, DMSO-d<sub>6</sub>)  $\delta$  ppm: CH<sub>2</sub>CH(CH<sub>3</sub>)<sub>2</sub>, d, 1.08, 6H; CH<sub>2</sub>CH(CH<sub>3</sub>)<sub>2</sub>, m, 2.20, 1H; CH<sub>2</sub>CH(CH<sub>3</sub>)<sub>2</sub>, d, 4.23, 2H; CH<sub>3</sub>-QX (ring), s, 2.48, 3H; C=O(OCH<sub>3</sub>), s, 4.08, 3H; QX (ring), d, 8.42, 1H; d, 8.59, 1H; s, 8.92, 1H. <sup>13</sup>C-NMR (400 MHz, DMSO-d<sub>6</sub>)  $\delta$  ppm: CH<sub>2</sub>CH(CH<sub>3</sub>)<sub>2</sub>, 14.61; CH<sub>2</sub>CH(CH<sub>3</sub>)<sub>2</sub>, 19.32; CH<sub>2</sub>CH(CH<sub>3</sub>)<sub>2</sub>, 71.97; CH<sub>3</sub>-QX (ring), 27.83; C=O-O-CH<sub>3</sub>, 54.47; C=O-O-CH<sub>3</sub>, 160.46; C=O-O-, 164.48; QX(ring), 121.44, 121.63, 131.02, 132.10, 132.65, 135.60, 138.15, 139.90.

**T-171:** 2-phenyl carbamoyl-3-phenyl-quinoxaline-7-butylcarboxylate-1,4-di-*N*-oxide. This compound obtained a 21.88 % yield. FT IR ( $\nu$  cm<sup>-1</sup>): 1337.66 (N-Oxide); 3297.34 (N-H); 2900-3000 (ArC-H); 2900-2800 (C-H); 1718.67, 1665.84 (C=O); 1160-1300 ((C=O)-C-O). <sup>1</sup>H-NMR: CH<sub>2</sub>-CH<sub>2</sub>-CH<sub>2</sub>-CH<sub>3</sub>, t, 0.98, 3H; CH<sub>2</sub>-CH<sub>2</sub>-CH<sub>2</sub>-CH<sub>3</sub>, m, 1.49, 2H; CH<sub>2</sub>-CH<sub>2</sub>-CH<sub>2</sub>-CH<sub>3</sub>, m, 1.79, 2H; CH<sub>2</sub>-CH<sub>2</sub>-CH<sub>2</sub>-CH<sub>3</sub>, t, 4.43, 2H; C=O-NH-(phenyl), dd, 7.56, 2H; t, 7.35, 2H; t, 7.12, 1H; C=O-NH s, 10.79, 1H; QX(ring), dd, 8.48, 1H; d, 8.70, 1H; ds, 9.04, 1H. <sup>13</sup>C-NMR (400 MHz, DMSO-d<sub>6</sub>)  $\delta$  ppm: CH<sub>2</sub>-CH<sub>2</sub>-CH<sub>2</sub>-CH<sub>3</sub>, 14.03; CH<sub>2</sub>-CH<sub>2</sub>-CH<sub>2</sub>-CH<sub>3</sub>, 19.19; CH<sub>2</sub>-CH<sub>2</sub>-CH<sub>2</sub>-CH<sub>3</sub>, 30.61; CH<sub>2</sub>-CH<sub>2</sub>-CH<sub>2</sub>-CH<sub>3</sub>, 66.12; C=O-O, 164.54; C=O-NH-(phenyl), 119.96, , 122.28, 125.05, , 128.70, 130.25; C=O, 156.69; QX(C3) phenyl, 122.05, 128.42, 129.47, 130.79, 131.84, 132.21, 133.41; QX(ring), 121.72, 121.86, 133.74, 137.98, 138.26, 139.50, 140.94.

**Supplementary Table S1.** Free-energy of binding (FEB) and interaction profile for n-butyl and isobutyl quinoxaline-7-carboxylate-1,4-di-*N*-oxide derivatives binding on the active site of *Tc*TR.

| Compound | Free-energy of binding (FEB)<br>kcal/mol | PLIP interaction profile                                                                      |                      |                                                   |
|----------|------------------------------------------|-----------------------------------------------------------------------------------------------|----------------------|---------------------------------------------------|
|          |                                          | Hydrophobic                                                                                   | Hydrogen bond        | Others                                            |
| T-137    | -6.8                                     | Ile339(B),<br>Asn340(B),<br>Ile458(A)                                                         | Gly459(A), Glu466(A) |                                                   |
| T-138    | -7.8                                     | Pro336, Ile339,<br>Asn340                                                                     | Glu466(A)            |                                                   |
| T-139    | -6.9                                     | Pro336(B),<br>Ile339(B),<br>Asn340(B),<br>Phe396(A)                                           | Glu466(A)            |                                                   |
| T-140    | -6.7                                     | Pro336(B),<br>Ile339(B),<br>Asn340(B),<br>Phe396(A)                                           | Glu466(A)            |                                                   |
| T-141    | -7.9                                     | Ile 339(B),<br>Asn340(B),<br>Phe396(A),<br>Leu399(A),<br>Ile458(A)                            | Gly459(A), Glu466(A) |                                                   |
| T-142    | -8.1                                     | Pro336(B),<br>Ile339(B),<br>Asn340(B),<br>Phe396(A)                                           |                      |                                                   |
| T-143    | -7.7                                     | Ile339(B),<br>Asn340(B),<br>Phe396(A),<br>Pro462(A)                                           | His461(A), Glu466(A) | His461(A) ( $\pi$ -stacking)                      |
| T-144    | -7.8                                     | Pro336(B),<br>Ile339(B),<br>Asn340(B),<br>Leu399(A),<br>Ile458(A),<br>Pro462(A),<br>Glu466(A) | Glu466(A), Glu467(A) | His461(A) ( $\pi$ -stacking)                      |
| T-145    | -7.5                                     | Pro336(B),<br>Ile339(B),<br>Glu466(A)                                                         | Gly459(A)            | His461(A) (salt bridge), Tyr455(A) (Halogen bond) |
| T-146    | -7.3                                     | Ile339(B),<br>Asn340(B),<br>Phe396(B)                                                         |                      |                                                   |

|       |      |                                                                                 |                      |                                                         |
|-------|------|---------------------------------------------------------------------------------|----------------------|---------------------------------------------------------|
| T-147 | -7.3 | Ile339(B),<br>Asn340(B)                                                         | Gly459(A)            | Pro336(B) (halogen<br>bond), Arg472(A)<br>(salt bridge) |
| T-148 | -7.8 | Pro336(B),<br>Ile339(B),<br>Asn340(B),<br>Phe396(A)                             | Glu466(A)            |                                                         |
| T-149 | -8.3 | Pro336(B),<br>Ile339(B),<br>Asn340(B)                                           |                      |                                                         |
| T-150 | -9.9 | Pro336(B),<br>Ile339(B),<br>Asn340(B),<br>Phe396(A),<br>Leu399(A),<br>Pro462(A) |                      |                                                         |
| T-151 | -8.4 | Pro336(B),<br>Ile339(B),<br>Phe396(A),<br>Leu399(A),<br>Pro462(A)               | Glu466(A)            | His461(A) ( $\pi$ -<br>stacking)                        |
| T-155 | -7   | Pro336(B),<br>Ile339(B),<br>Glu466(A)                                           | Gly459(A), Arg472(A) | His461(A) (salt<br>bridge), Thr457(A)<br>(halogen bond) |
| T-156 | -7.9 | Ile339(B),<br>Asn340(B),<br>Phe396(A),<br>Ile458(A)                             |                      |                                                         |
| T-157 | -9   | Pro336(B),<br>Ile339(B),<br>Phe396(A),<br>Leu399(A),<br>Pro462(A)               |                      |                                                         |
| T-158 | -7.8 | Pro336(B),<br>Ile339(B),<br>Asn340(B),<br>Phe396(A)                             |                      |                                                         |
| T-159 | -7.4 | Pro336(B),<br>Ile339(B)                                                         | Glu466(A)            | Arg472(A) ( $\pi$ -cation)                              |
| T-161 | -7.5 | Pro336(B),<br>Ile339(B),<br>Asn340(B),<br>Phe396(A),<br>Ile458(A),<br>Glu466(A) |                      |                                                         |



|       |      |                                                                                               |                                    |                                                   |
|-------|------|-----------------------------------------------------------------------------------------------|------------------------------------|---------------------------------------------------|
| T-162 | -8.4 | Ile339(B),<br>Asn340(B),<br>Phe396(A),<br>Leu399(A),<br>Ile458(A),<br>Pro462(A)               | Gly459(A), Glu466(A)               |                                                   |
| T-163 | -8.4 | Pro336(B),<br>Ile339(B),<br>Asn340(B),<br>Ile458(A),<br>Pro462(A),<br>Glu467(A)               | Glu466(A), Glu467(A)               | His461(A) ( $\pi$ -stacking)                      |
| T-164 | -8.2 | Ile339(B),<br>Phe396(A),<br>Glu466(A)                                                         | Gly459(A), Glu466(A)               |                                                   |
| T-165 | -8.1 | Pro336(B),<br>Ile339(B),<br>Asn340(B),<br>Leu399(A),<br>Pro462(A),<br>Glu466(A)               | Glu466(A), Glu467(A)               | His461(A) ( $\pi$ -stacking)                      |
| T-166 | -7.1 | Ile339(B),<br>Asn340(B)<br>Ile458(A),<br>Glu466(A)                                            | Gly459(A), Glu466(A)               |                                                   |
| T-167 | -8.4 | Ile107(B),<br>Pro336(B),<br>Ile339(B),<br>Asn340(B),<br>Phe396(A),<br>Leu399(A),<br>Pro462(A) | Glu466(A)                          | His461(A) ( $\pi$ -stacking)                      |
| T-168 | -7.8 | Val54(B),<br>Thr335(B),<br>Ile339(B),<br>Ala343(B)                                            | Gly459(A)                          | His461(A) (salt bridge), Tyr455(A) (halogen bond) |
| T-169 | -8.1 | Ile339(B),<br>Asn340(B),<br>Phe396(A),<br>Ile458(A),<br>Pro462(A)                             | Gly459(A), His461(A),<br>Glu466(A) | His461(A) ( $\pi$ -stacking)                      |
| T-170 | -7   | Ile339(B),<br>Asn340(B),<br>Ile458(A)                                                         | Gly459(A), Glu466(A)               |                                                   |

|                                   |      |                        |                                                           |                            |
|-----------------------------------|------|------------------------|-----------------------------------------------------------|----------------------------|
| Trypanothione<br>disulfide (1BZL) | -8.7 | Trp22(B),<br>Phe396(A) | Ser15(A), Glu19(B),<br>Tyr111(B), Thr463(A),<br>Glu466(A) | His461(A) (salt<br>bridge) |
|-----------------------------------|------|------------------------|-----------------------------------------------------------|----------------------------|

---

**Supplementary Table S2.** Free-energy of binding (FEB) and 2D-interaction profile representation for all n-butyl and isobutyl quinoxaline-7-carboxylate-1,4-di-*N*-oxide derivatives binding on the active site of *Tc*TR.

2D-interaction profiles

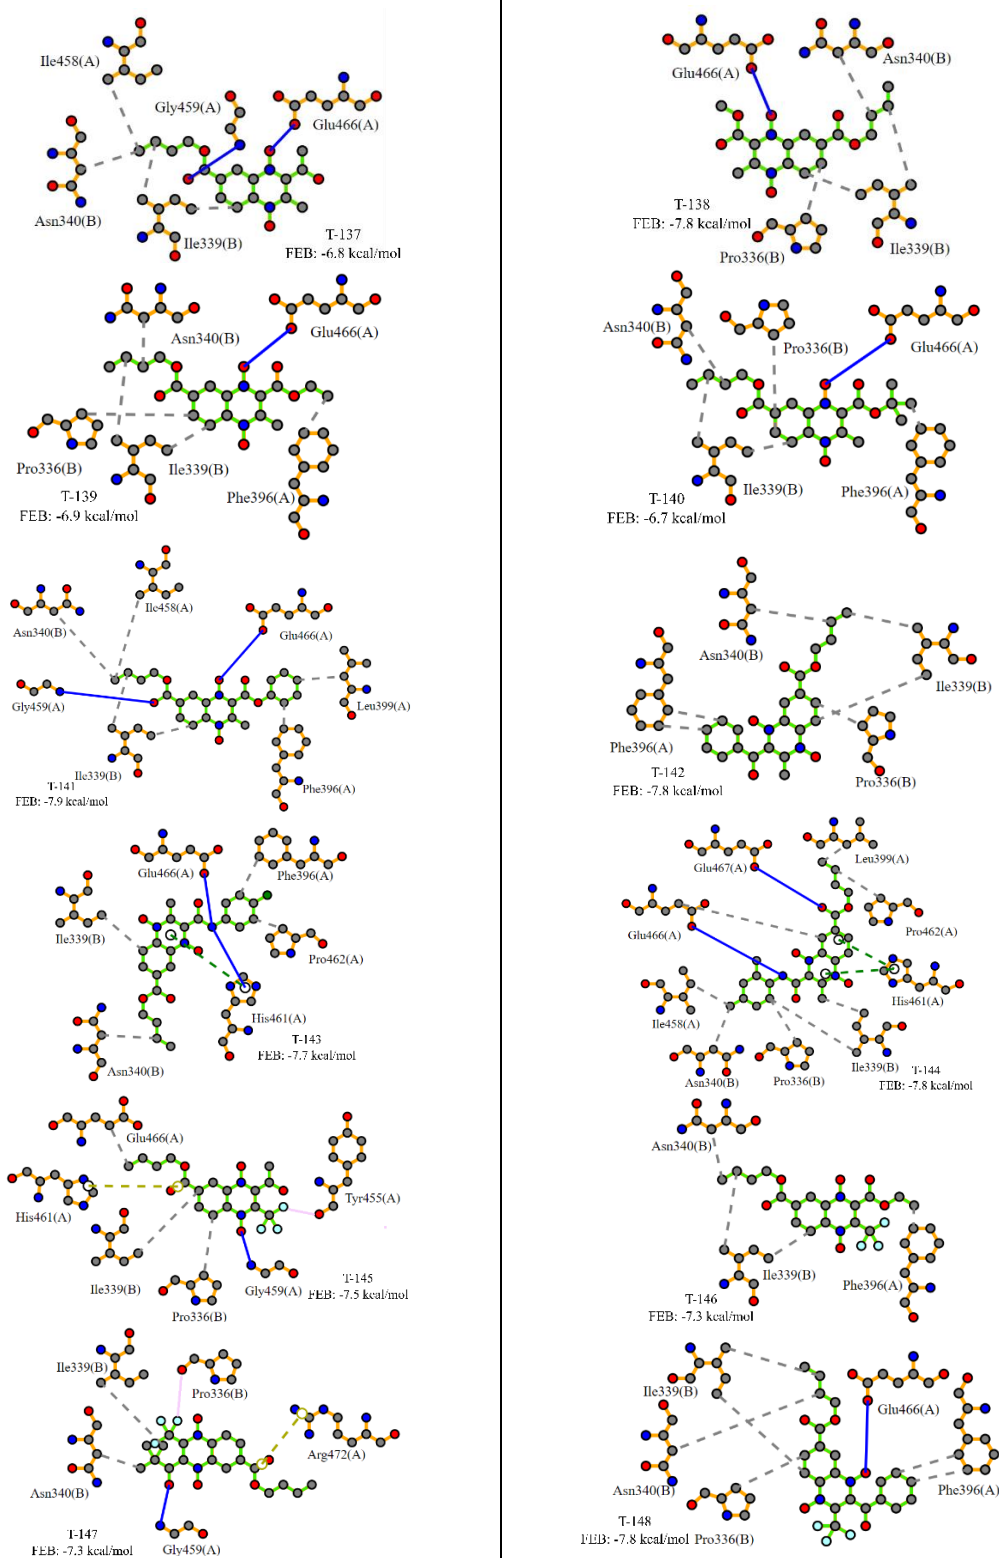

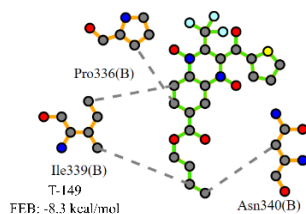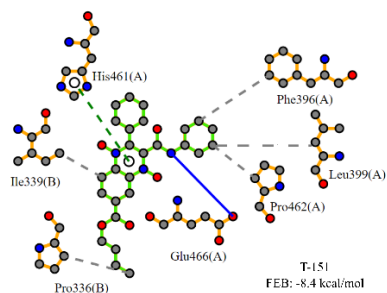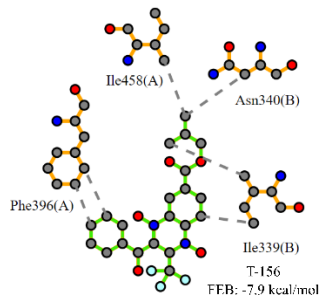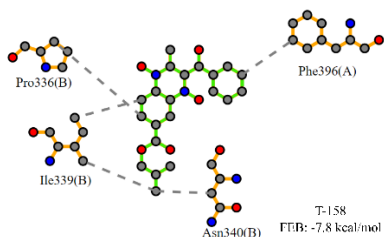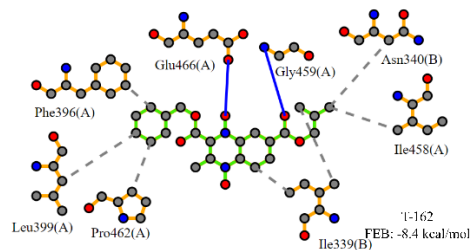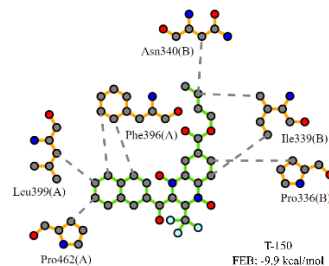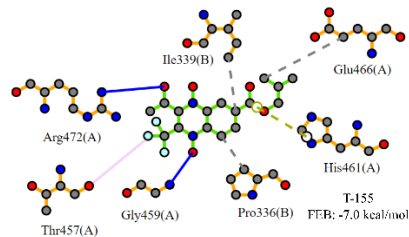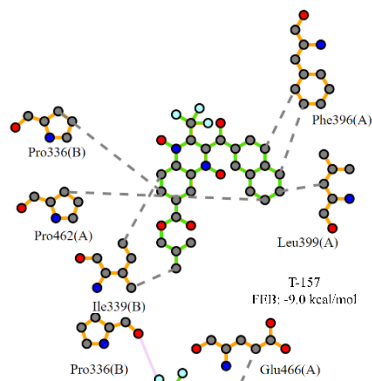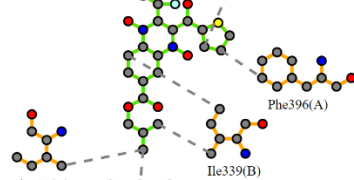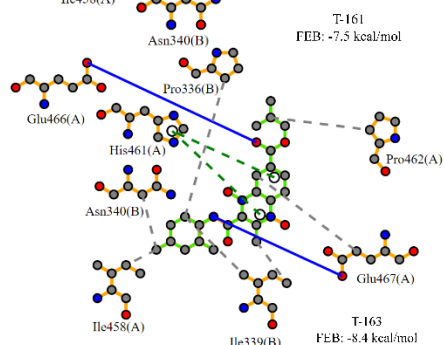

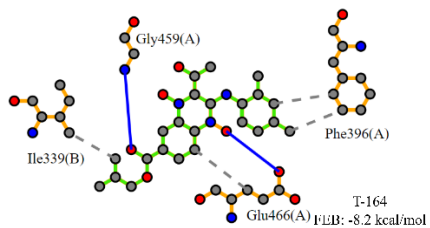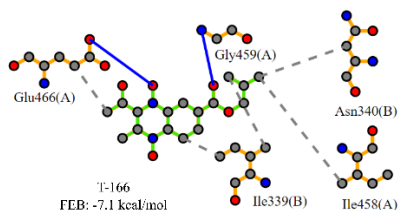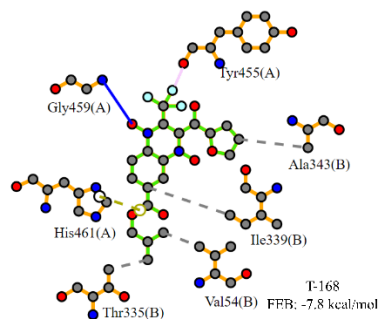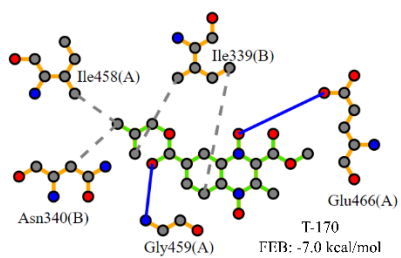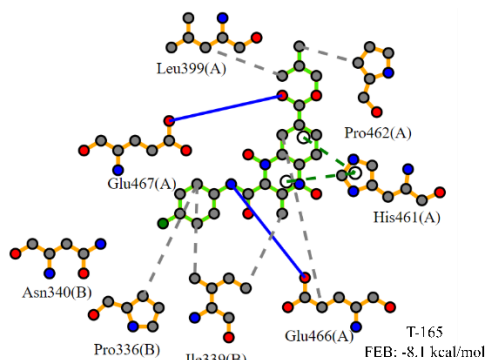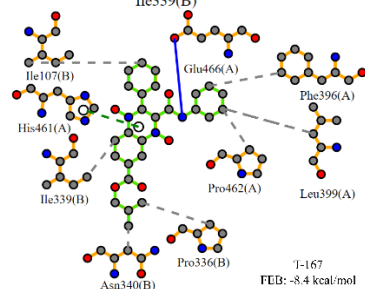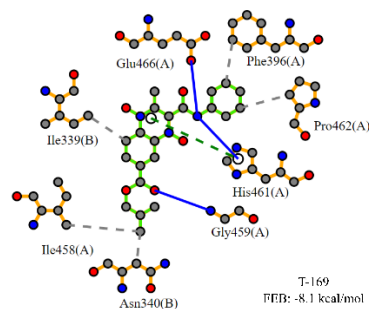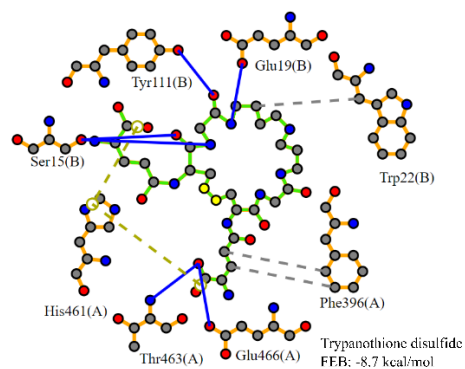

Interaction type legend: dashed grey line: hydrophobic interaction, solid blue line: hydrogen bond, dashed golden line: salt bridge, dashed green line:  $\pi$ -stacking, solid light violet line: halogen interaction.

### 3D-representation of T-147 and natural ligand trypanothione disulfide

Interaction profiles for top ranked docking poses for new TR inhibitor compound T-147 (a) and natural ligand trypanothione disulfide (b) with trypanothione reductase.

T-147

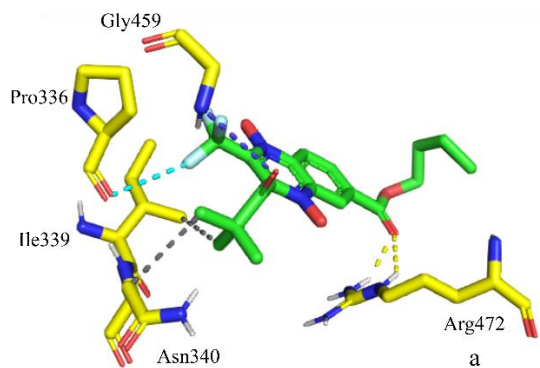

Trypanothione disulfide

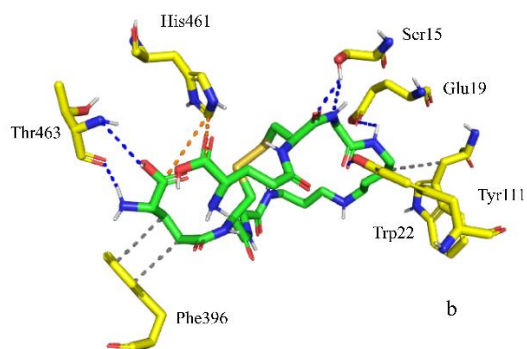

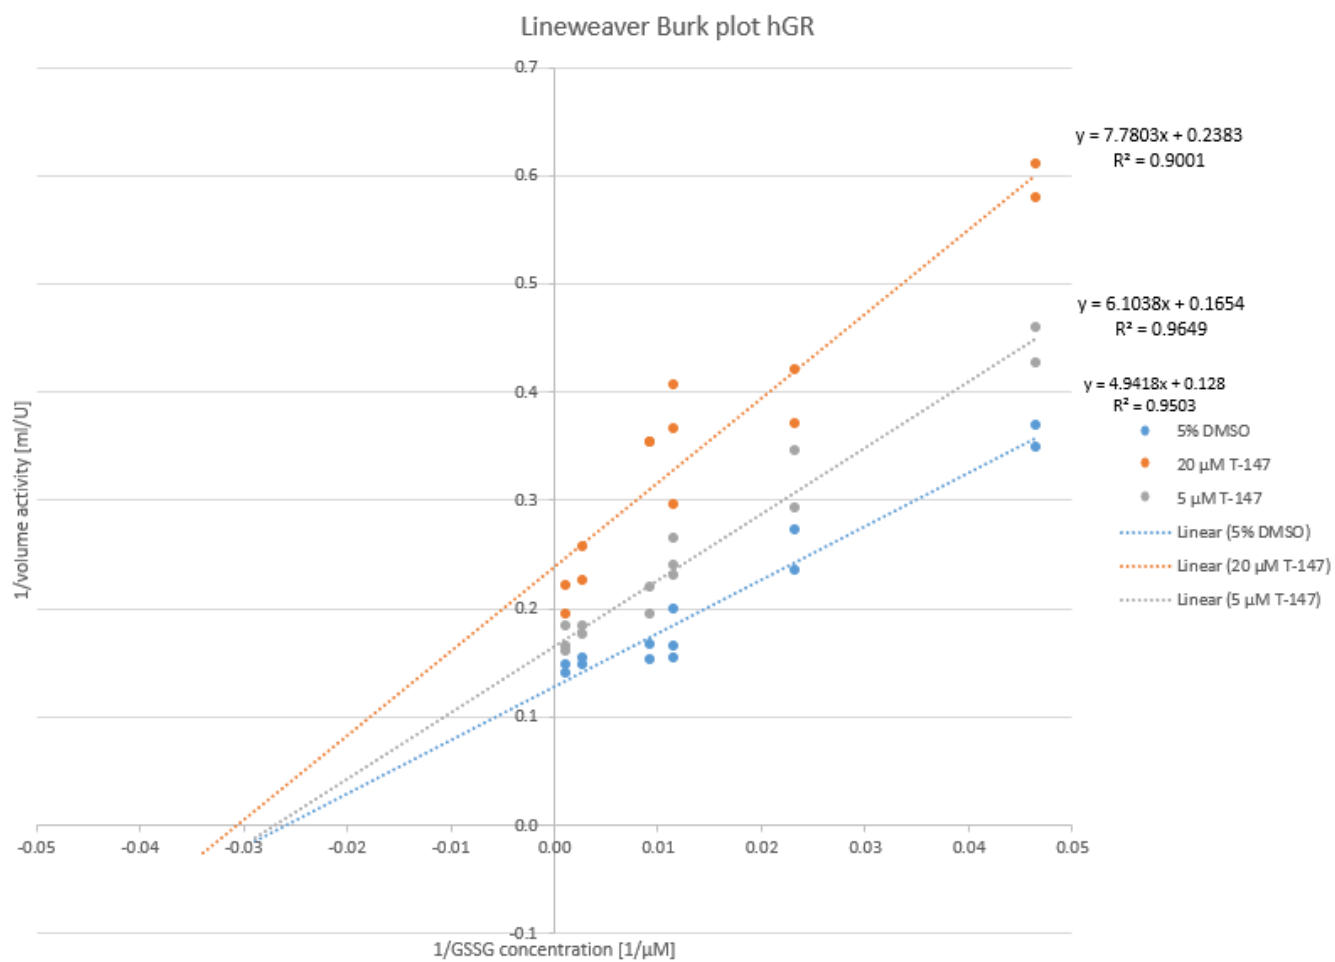

**Supplementary Figure S1.** Lineweaver Burk plot of GR inhibition by the compound T-147.

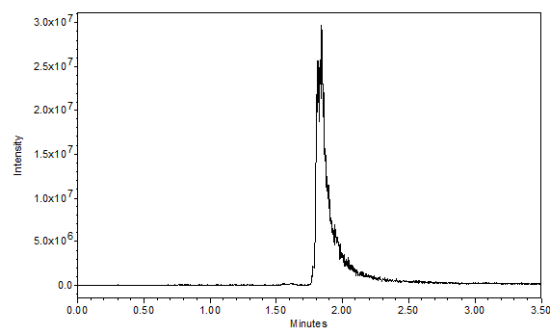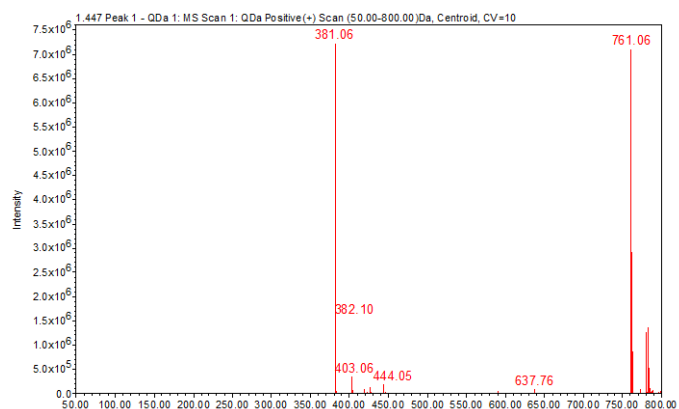

T-142 Chromatogram and mass spectrometry spectrum

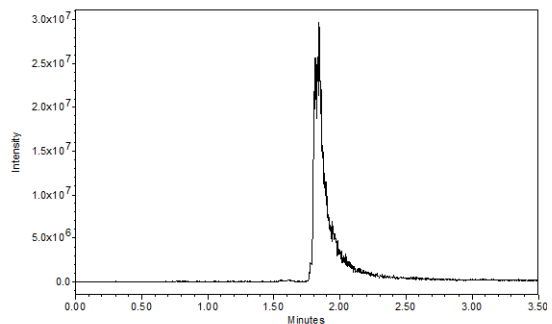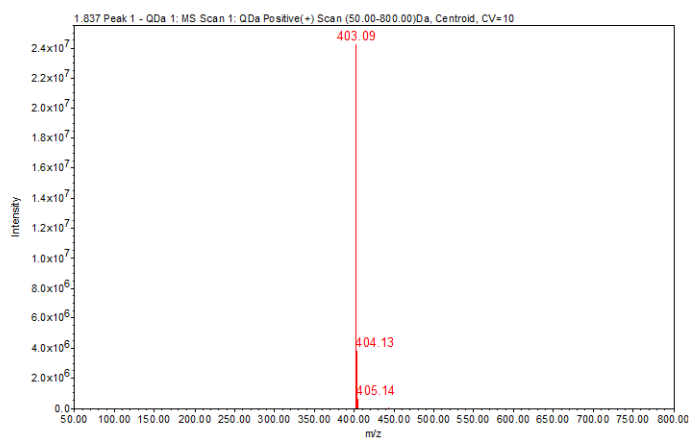

T-146 Chromatogram and mass spectrometry spectrum

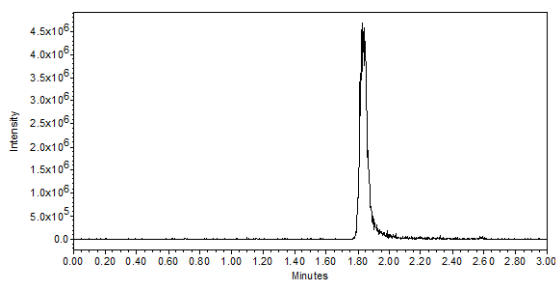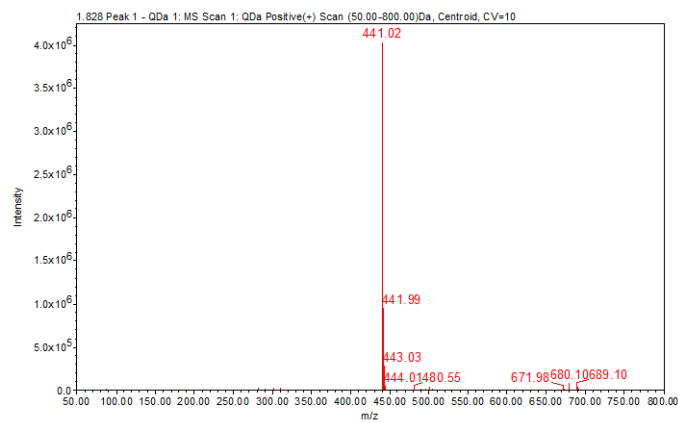

T-149 Chromatogram and mass spectrometry spectrum



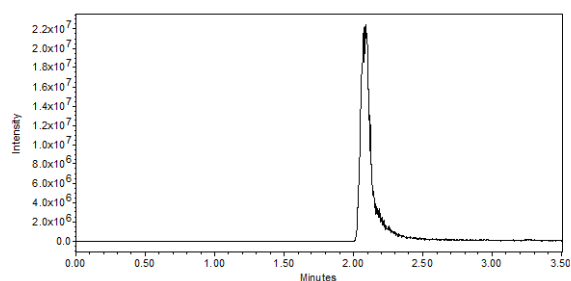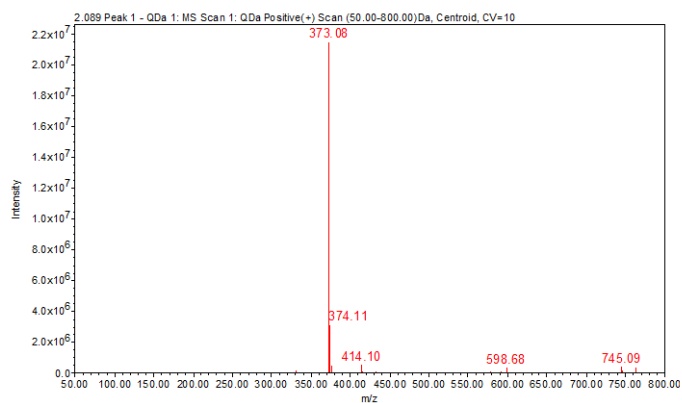

T-155 Chromatogram and mass spectrometry spectrum

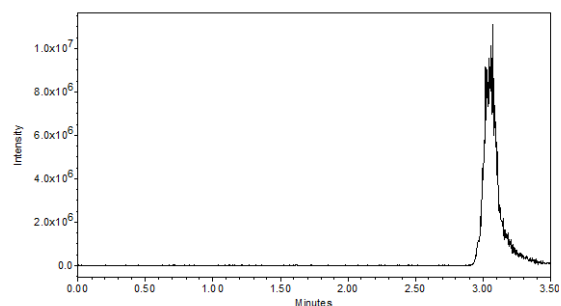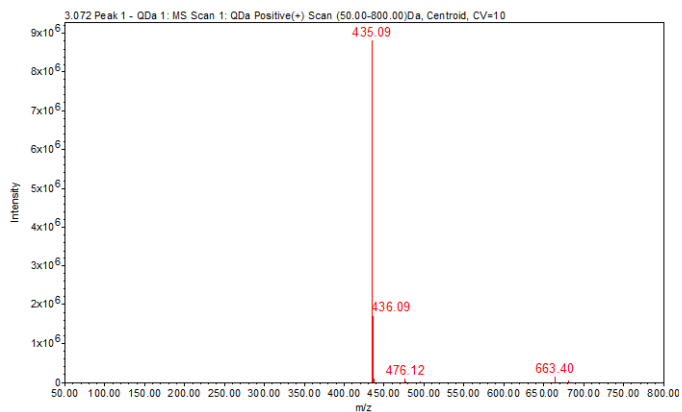

T-156 Chromatogram and mass spectrometry spectrum

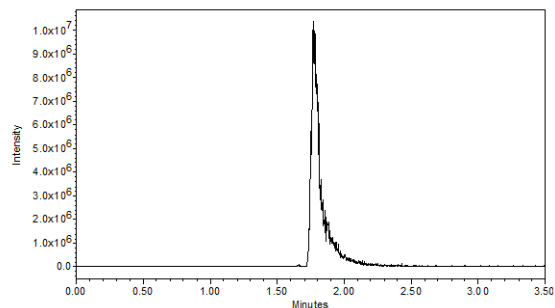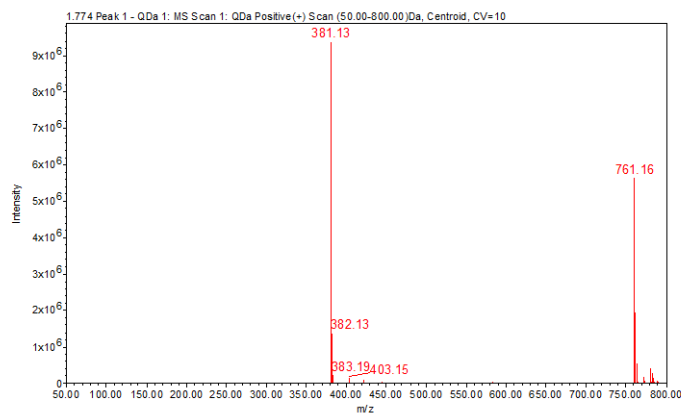

T-158 Chromatogram and mass spectrometry spectrum
